# Supplementary material
Source: Research Square preprint supplement (doi:10.21203/rs.3.rs-10272925/v1)
Supplement: Supplementary file 1 [file a237b3d5ea56a5741c8c1bb4.docx]

**Preparation of Tetra-Branched PEG Network and Its Application to Gel Polymer Electrolyte**

Tomoya Enoki, Ryodai Kagami, Takahiro Uno, Nanami Sasaki, Nobuyuki Imanishi and Masataka Kubo*

Division of Applied Chemistry, Graduate School of Engineering, Mie University, 1577 Kurimamachiya-cho, Tsu 514-8507, Mie, Japan

*Corresponding Author e-mail: kubo@chem.mie-u.ac.jp

**Figure S1.** 1H NMR of **2a** in CDCl3

**Figure S2.** 1H NMR of **2b** in CDCl3

**Figure S3.** 1H NMR of **2c** in CDCl3

**Figure S4.** DSC of Gel Polymer Electrolyte (entry 1, Table 1)

**Figure S5.** DSC of Gel Polymer Electrolyte (entry 2, Table 1)

**Figure S6.** DSC of Gel Polymer Electrolyte (entry 3, Table 1)

**Figure S7.** DSC of Gel Polymer Electrolyte (entry 4, Table 1)

**Figure S8.** DSC of Gel Polymer Electrolyte (entry 5, Table 1)

**Figure S9.** DSC of Gel Polymer Electrolyte (entry 6, Table 1)
